# Supplementary material for: Copper ion based metal–organic framework nanomaterials with roughness enhanced protein adhesion for high-efficiency hemoglobin separation
Source: Royal Society of Chemistry journal article supplement (doi:10.1039/d2nj06115e), 2023-01-01
Supplement: d2nj06115e1.pdf [file d2nj06115e1.pdf]

## Supplementary Information

### **Copper ion based metal–organic frameworks nanomaterials with roughness-enhanced protein adhesion for high-efficiency hemoglobin separation**

Qiu-Ling He<sup>b,§</sup>, Ben-Xu Jia<sup>a,b,§</sup>, Yu-Kun Wang<sup>a,§</sup>, Wang-Bo Xu<sup>a</sup>, Meng Qin<sup>b</sup>, Zhen Zhang<sup>c,\*</sup>, Yan-Fang Feng<sup>b,\*</sup> and Bo Zhou<sup>a,\*</sup>

<sup>a</sup> Scientific Research Center, Guilin Medical University, Guilin, Guangxi, 541199, People's Republic of China.

<sup>b</sup> College of Pharmacy, Guilin Medical University, Guilin, Guangxi, 541199, People's Republic of China.

<sup>c</sup> School of Intelligent Medicine and Biotechnology, Guilin Medical University, Guilin, Guangxi, 541199, People's Republic of China.

§ These author contributed equally to this work.

\*E-mail: zhenzhang@glmc.edu.cn;

1328468450@qq.com;

zb090900021@163.com.

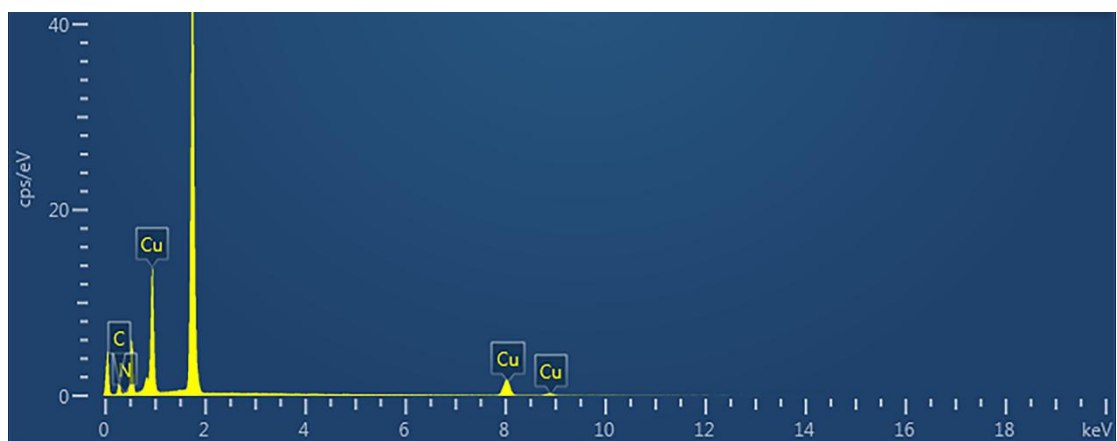

**Fig. S1** EDX analysis of Cu-MOF.

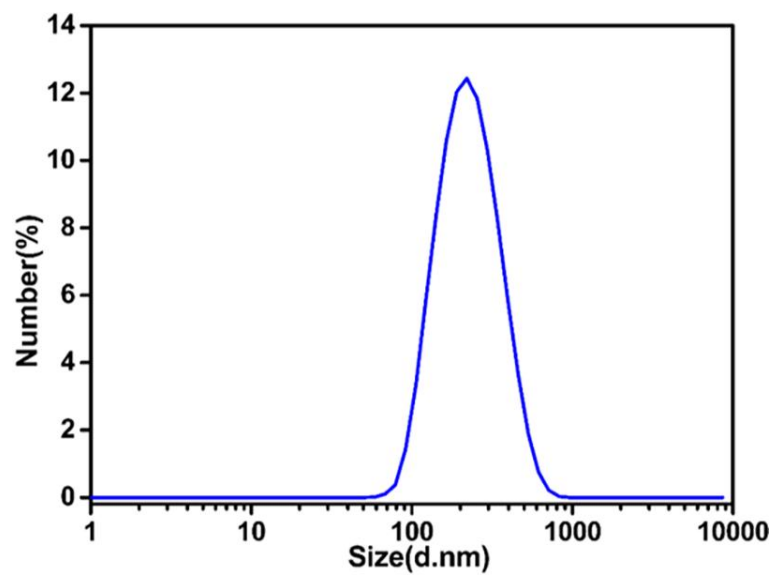

**Fig. S2** Particle sizes of Cu-MOF.

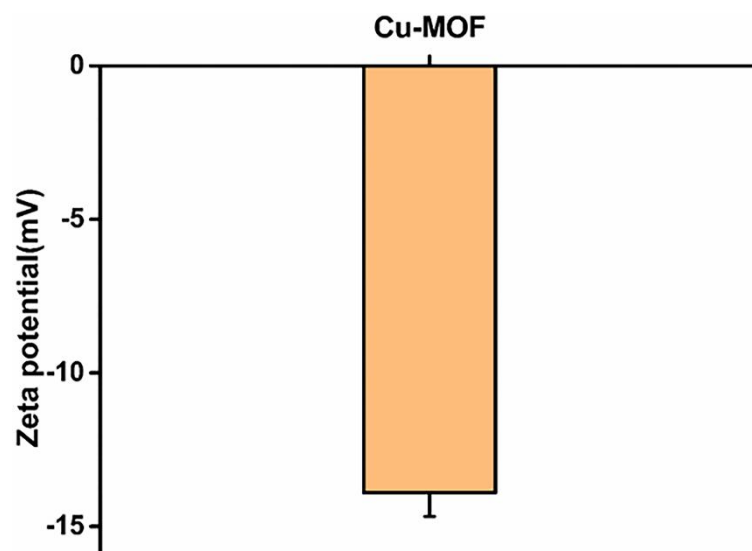

**Fig. S3** Zeta potentials of Cu-MOF.

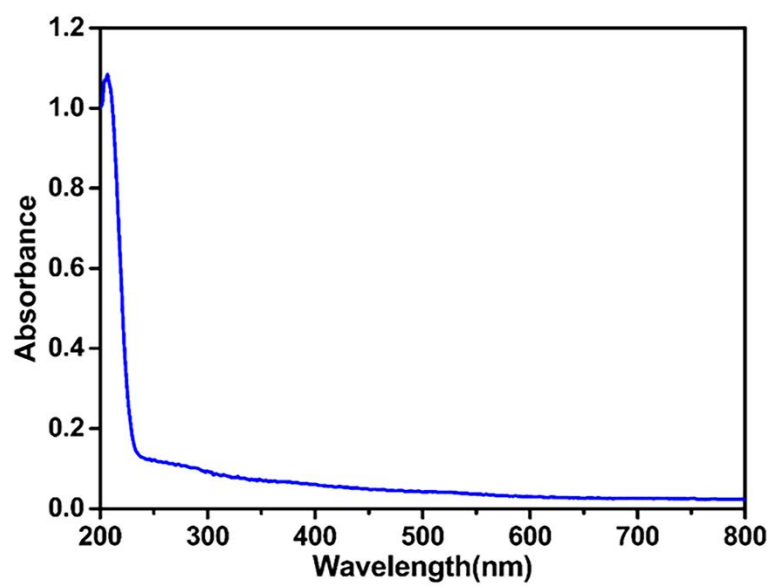

Fig. S4 UV-vis spectrum of Cu-MOF.

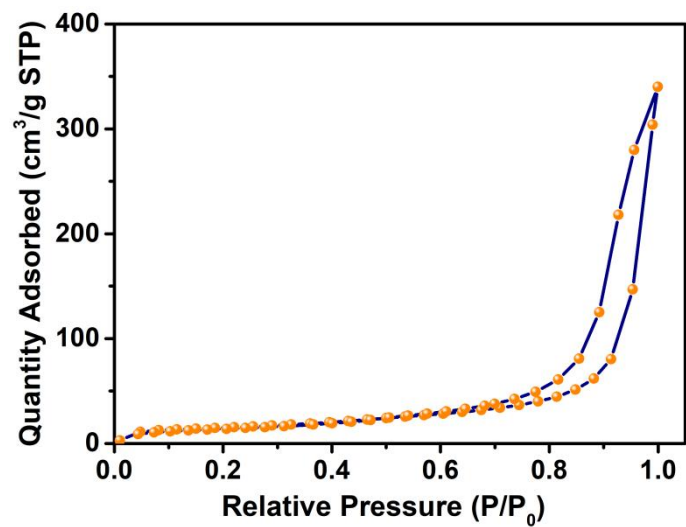

**Fig. S5** The N<sub>2</sub> adsorption-desorption isotherms curves of Cu-MOF.

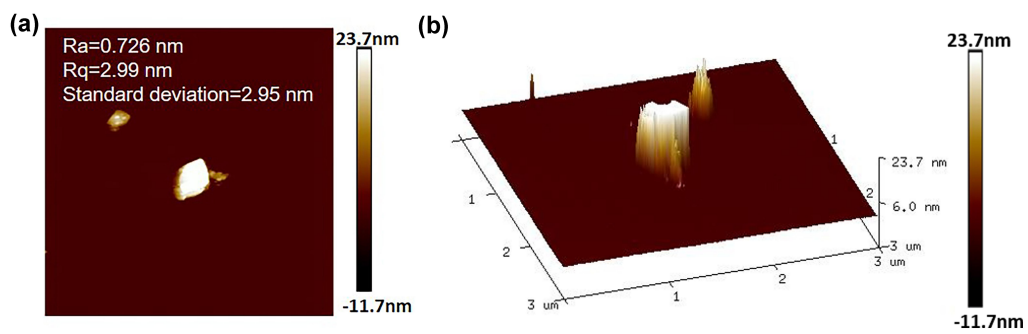

**Fig. S6** (a) AFM images and (b) 3D surface topography of Cu-MOF.

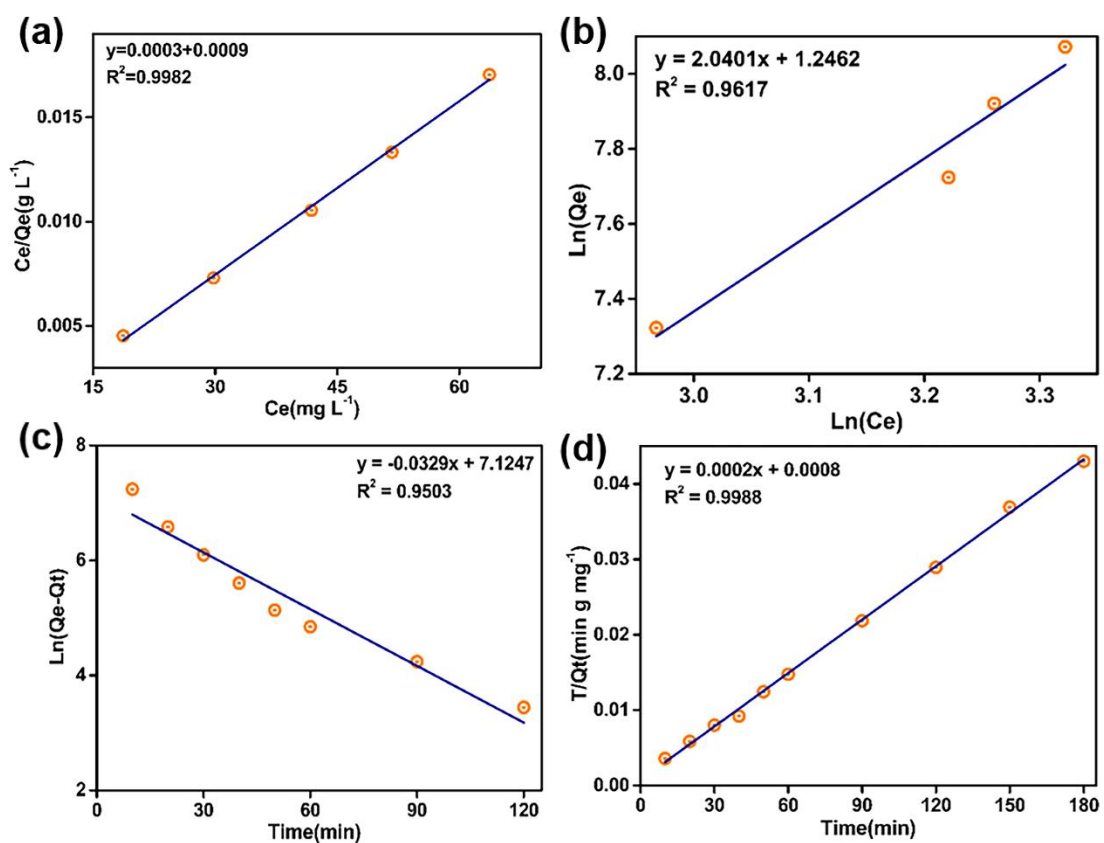

**Fig. S7** (a) Langmuir model, (b) Freundlich model, (c) Pseudo-first-order model, and (d) Pseudo-second-order model.



**Table S1.** Langmuir and Freundlich parameters of Cu-MOF for BHB adsorption.

| Langmuir                |        | Freundlich |        |
|-------------------------|--------|------------|--------|
| $Q_m(\text{mg g}^{-1})$ | $R^2$  | $1/n$      | $R^2$  |
| 4161.7                  | 0.9982 | 7.691      | 0.9617 |

**Table S2.** Comparison of the adsorption capacity of BHp on different MOF-based adsorbent materials.

| Adsorbents                               | Adsorption capacity<br>(mg g <sup>-1</sup> ) | Reference |
|------------------------------------------|----------------------------------------------|-----------|
| Fe <sub>3</sub> O <sub>4</sub> @NiFe LDH | 3287.67                                      | 1         |
| PDA@F127/ZIF-67                          | 834.3                                        | 2         |
| Fe <sub>3</sub> O <sub>4</sub> @ZIF-8    | 6222                                         | 3         |
| HKUST-1/TiO <sub>2</sub> NM              | 179.2                                        | 4         |
| Y(BTC)(H <sub>2</sub> O) <sub>6</sub>    | 555.6                                        | 5         |
| LaMOF-GO <sub>3</sub>                    | 193                                          | 6         |
| Cu-MOF                                   | 4161.7                                       | This work |

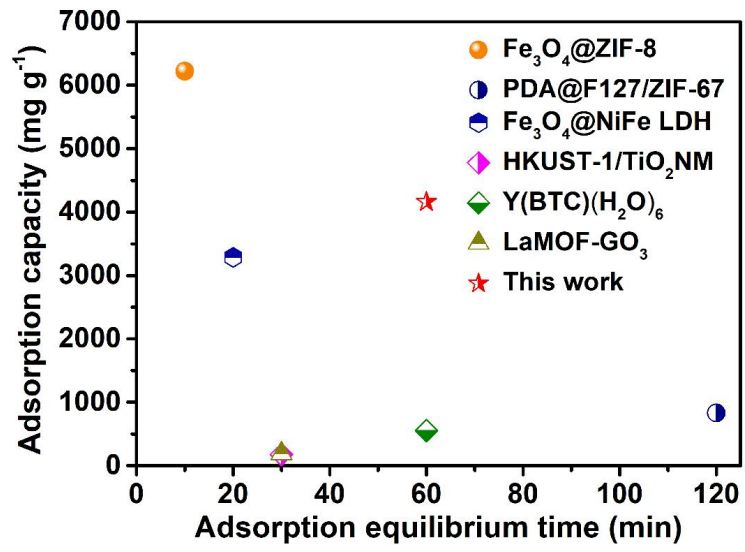

Fig. S8 Adsorption performance of reported representative MOF.

**Table S3.** Adsorption kinetics parameters of Cu-MOF for BHb adsorption.

| Pseudo-first-order             |                                 |         | Pseudo-second-order model             |                                 |         |
|--------------------------------|---------------------------------|---------|---------------------------------------|---------------------------------|---------|
| $k_1$<br>( $\text{min}^{-1}$ ) | $Q_e$<br>( $\text{mg g}^{-1}$ ) | $R_1^2$ | $k_2$<br>( $\text{g (mg min)}^{-1}$ ) | $Q_e$<br>( $\text{mg g}^{-1}$ ) | $R_2^2$ |
| 0.0519                         | 2176.72                         | 0.9503  | 0.0005                                | 5000                            | 0.9988  |

| Intraparticle<br>diffusion<br>model | Initial phase                                  |                                 |         | Secondary phase                                |                                 |         |
|-------------------------------------|------------------------------------------------|---------------------------------|---------|------------------------------------------------|---------------------------------|---------|
|                                     | $k_{p1}$<br>( $\text{mg (g min}^{1/2})^{-1}$ ) | $C_1$<br>( $\text{mg g}^{-1}$ ) | $R_1^2$ | $k_{p2}$<br>( $\text{mg (g min}^{1/2})^{-1}$ ) | $C_2$<br>( $\text{mg g}^{-1}$ ) | $R_2^2$ |
|                                     | 350.46                                         | 1779.5                          | 0.9582  | 25.307                                         | 3870.2                          | 0.9316  |

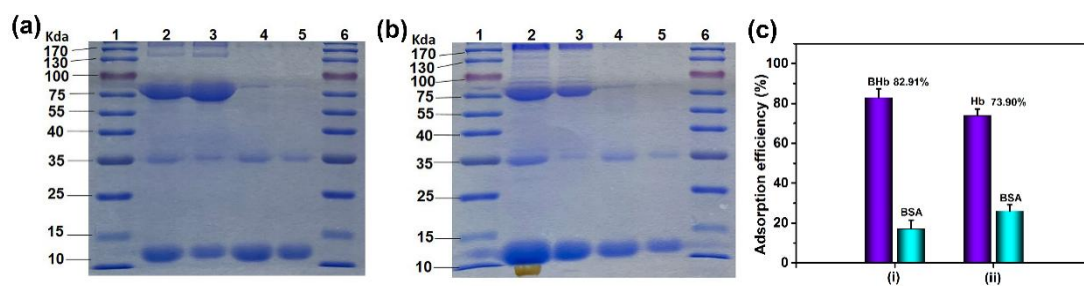

**Fig. S9** SDS-PAGE assay results. (a) BHB and BSA binary solution and (b) Bovine whole blood. Line 1 and 6: protein molecular weight marker, line 2: (a)  $200 \mu\text{g mL}^{-1}$  BHB and BSA binary solution, (b) 20-fold bovine whole blood, line 3: the supernatant after the enrichment by Cu-MOF, line 4: the elute, line 5:  $200 \mu\text{g mL}^{-1}$  BHB standard solution. (c) Calculation of the adsorption efficiency of Cu-MOF on BHB/Hb in (i) BHB and BSA binary solution and (ii) bovine whole blood by Image J.

## References

1. S. Shi, W. T. Zhang, H. F. Wu, Y. C. Li, X. Y. Ren, M. Li, J. Liu, J. Sun, T. L. Yue and J. L. Wang, *ACS Sustain. Chem. Eng.*, 2020, **8**, 4966–4974.
2. S. Y. Tan, Y. Long, Q. Han, H. Y. Guan, Q. L. Liang and M. Y. Ding, *ACS Biomater. Sci. Eng.*, 2020, **6**, 1387–1396.
3. J. N. Zheng, Z. Lin, L. Guo, H. H. Yang and L. Zhang, *J. Mater. Chem., B*, 2015, **3**, 2185–2191.
4. H. Xu, J. Guo, C. Li, J. Zhao, Z. Gao and Y. Y. Song, *ACS Appl Mater Interfaces*, 2022, **14**, 22006–22015.
5. Y. Shu, Y. Meng, M. L. Chen and J. H. Wang, *Chinese Chemical Letters*, 2015, **26**, 1460–1464.
6. J. W. Liu, Y. Zhang, X. W. Chen and J. H. Wang, *ACS Appl Mater Interfaces*, 2014, **6**, 10196–10204.
